# Supplementary material for: Progesterone Receptor Is a Haploinsufficient Tumor-Suppressor Gene in Cervical Cancer
Source: Oxford University Press journal article supplement (doi:10.1158/1541-7786.mcr-20-0704), 2020-11-02
Supplement: 15417786mcr200704-sup-249291_2_supp_6628764_qhsqsd.docx [file 15417786mcr200704-sup-249291_2_supp_6628764_qhsqsd.docx]

**Supplemental Table 1. List of Mouse Strains**

| **Genotype** | **MGI allele name** | **Description** | **Reference** |
| --- | --- | --- | --- |
| *K14E6* | Tg(KRT14-HPV16E6)5737Plam | Transgenic mouse expressing HPV16 E6 under the control of human *KRT14* promoter | (1) |
| *K14E7* | Tg(KRT14-HPV16E7)2304Plam | Transgenic mouse expressing HPV16 E7 under the control of human *KRT14* promoter | (2) |
| *Wnt7aCre* | Tg(Wnt7a-EGFP/cre)#Bhr | Transgenic mouse expressing EGFP-Cre fusion protein under the control of mouse *Wnt7a* enhancer and promoter | (3) |
| *Pgrf/f* | Pgrtm4.1Lyd | Conditional knockout mouse in which exon2 of the *Pgr* gene is flanked by *loxP* sites | (4) |
