# Supplementary material for: Progesterone Receptor Is a Haploinsufficient Tumor-Suppressor Gene in Cervical Cancer
Source: Oxford University Press journal article supplement (doi:10.1158/1541-7786.mcr-20-0704), 2020-11-02
Supplement: 15417786mcr200704-sup-249291_2_supp_6628765_qhsqsd.docx [file 15417786mcr200704-sup-249291_2_supp_6628765_qhsqsd.docx]

**Supplemental Table 2. List of Chemicals and Reagents**

| **Name** | **Supplier** | **Catalog No.** | **Comments** |
| --- | --- | --- | --- |
| Hematoxylin | Thermo Fisher Scientific, Fremont, CA | 6765015 |  |
| Eosin | Sigma Aldrich, St. Louis, MO | E4382 |  |
| Pepsin solution | Thermo Fisher Scientific, Fremont, CA | AP9007005 |  |
| Sodium citrate | Fisher Scientific Company, Pittsburgh, PA | BP327-500 |  |
| Paraformaldehyde | Sigma Aldrich, St. Louis, MO | P6148 |  |
| Hoechst 33258 | Sigma Aldrich, St. Louis, MO | B2883 |  |
| ApopTag | EMD Millipore, Burlington, MA | S7110 |  |
| Anti-ERα Ab | Immunotech, Marseille, France | IM1545 (clone 1D5) | 1:100 in 5% goat serum |
| Anti-Ki67 Ab | Thermo Scientific, Fremont, CA | RM-9106 (clone SP6) | 1:100 in 5% goat serum |
| Anti-MCM7 Ab* | Lab Vision, Fremont, CA | MS-862 (clone 47DC141) | 1:200 in 0.5% skim milk/5% goat serum |
| Anti-PR Ab | Sigma-Aldrich, St. Louis, MO | SAB5500165 (clone SP2) | 1:1,000 in 5% goat serum |
| Anti-p16Ink4a Ab | Rockland Immunochemicals, Limerick, PA | 600-401-AJ9 | 1:200 in 5% goat serum |
| Alexa Fluor 488- anti-rabbit IgG | Life Technologies, Carlsbad, CA | A11008 | 1:100 in 5% goat serum |
| Alexa Fluor 488- anti-mouse IgG | Life Technologies, Carlsbad, CA | A11001 | 1:100 in 5% goat serum |

*Discontinued
